# Supplementary material
Source: Springer Nature journal article supplement (https://www.springermedizin.de/resource/supplementary/12865_2009_325_MOESM14_ESM.pdf/9427762)

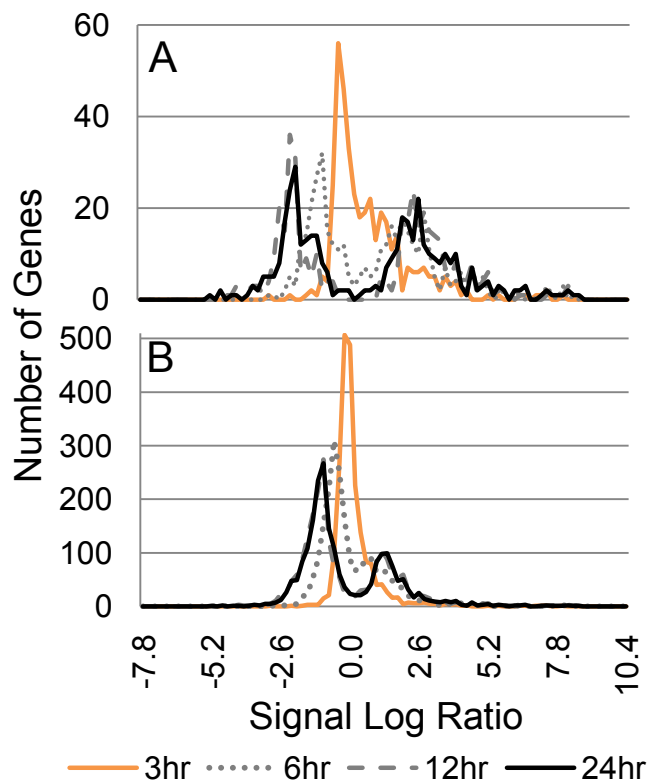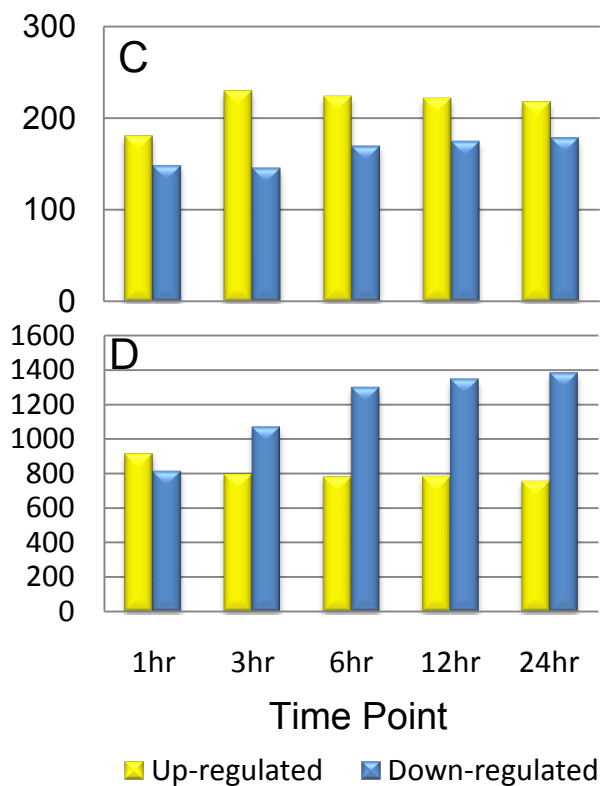

Supplement: MOESM14 [file 9427762]
